# Supplementary material for: Non-erythrocyte spectrin network preferentially stabilizes flat membrane and enhances cell stiffness
Source: Royal Society of Chemistry journal article supplement (doi:10.1039/d5ra08200e), 2025-01-01
Supplement: d5ra08200e1.pdf [file d5ra08200e1.pdf]

Electronic Supporting Information for *RSC Advances*

## **Non-erythrocyte spectrin network preferentially stabilizes flat membrane and enhances cell stiffness**

Takumi Komikawa<sup>1</sup>, Takahiro Miyake<sup>2</sup>, Mayu Morooka<sup>2</sup>, Rikuto Kawakami<sup>1</sup>, Shogo Saito<sup>2</sup>, Kevin Critchley<sup>3</sup>, Stephen D. Evans<sup>3</sup>, Mina Okochi<sup>2,\*</sup>, Masayoshi Tanaka<sup>1,\*</sup>

<sup>1</sup>School of Materials and Chemical Technology, Institute of Science, Tokyo, 4259 Nagatsuda, Midori-ku, Yokohama-city, Kanagawa 226-8503, Japan

<sup>2</sup>School of Materials and Chemical Technology, Institute of Science Tokyo, 2-12-1 O-okayama, Meguro-ku, Tokyo 152-8552, Japan

<sup>3</sup>School of Physics and Astronomy, University of Leeds, Leeds LS2 9JT, United Kingdom

### **\*Corresponding Authors:**

**Masayoshi Tanaka**

Email: tanaka.m@mct.isct.ac.jp

Tel/FAX: +81-45-924-5567

**Mina Okochi**

Email: okochi.m.aa@m.titech.ac.jp

Tel/FAX: +81-3-5734-2116

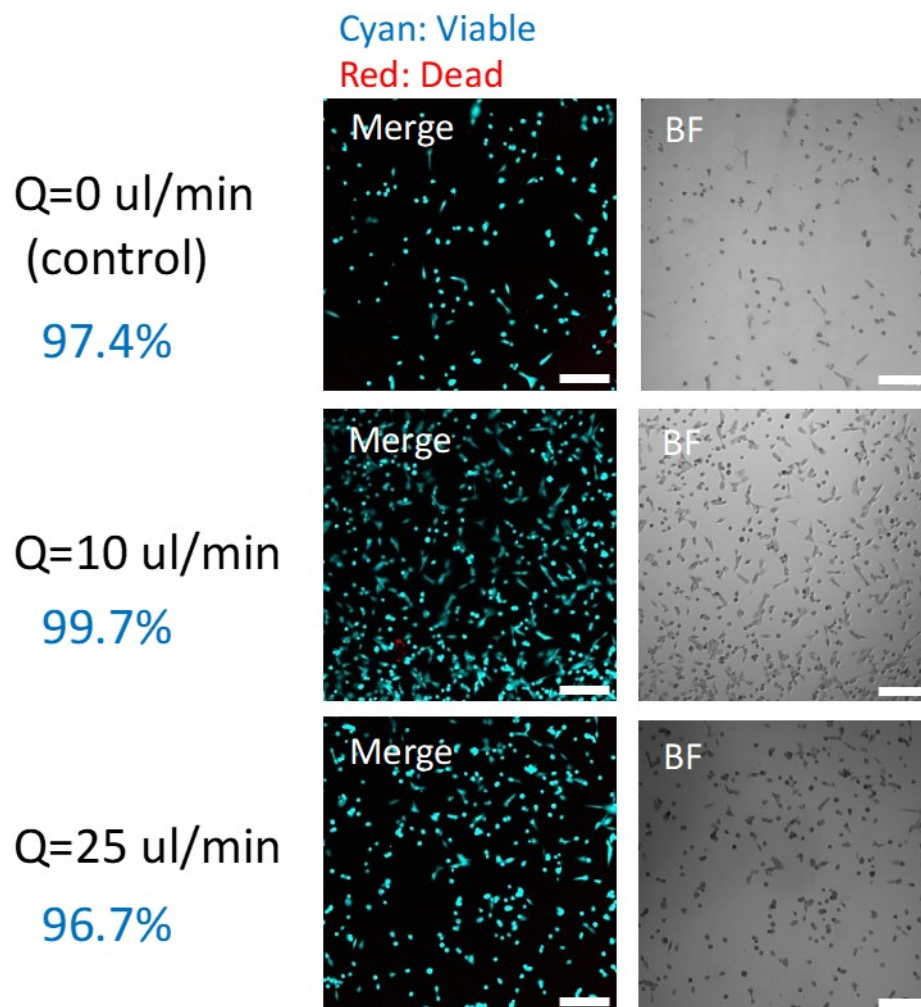

**Fig. S1** Cell viability of MDA-MB-231 cells after passage through the microfluidic cross-flow device. MDA-MB-231 cells were cultured for 24 hours post-treatment with varying flow rates (Q) and stained with Calcein-AM (live cells, cyan) and NucRed647 (dead cells, red). Cell viability was calculated from image analysis. Scale bar: 200  $\mu$ m.

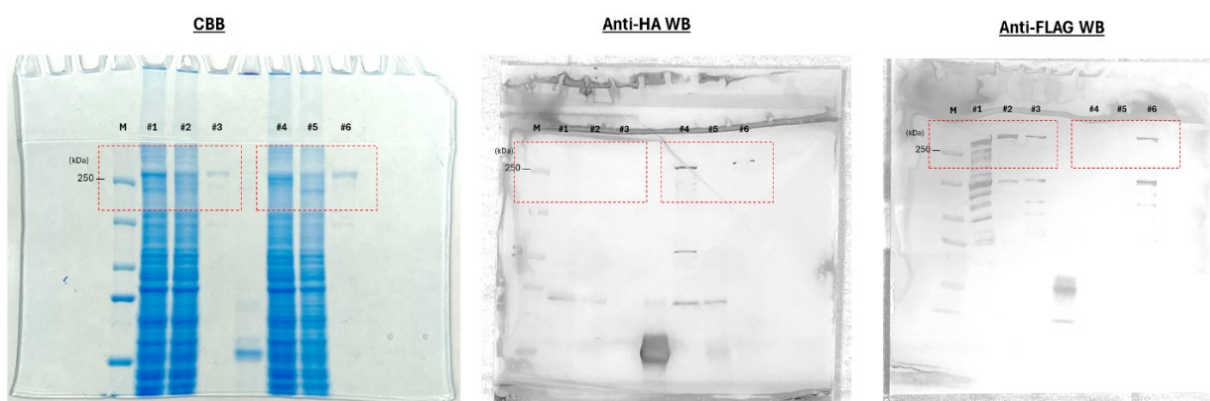

**Fig. S2** Full-length gel or membrane images corresponding to Fig. 1b in the main text. The red boxes indicate the regions used in the main figure.

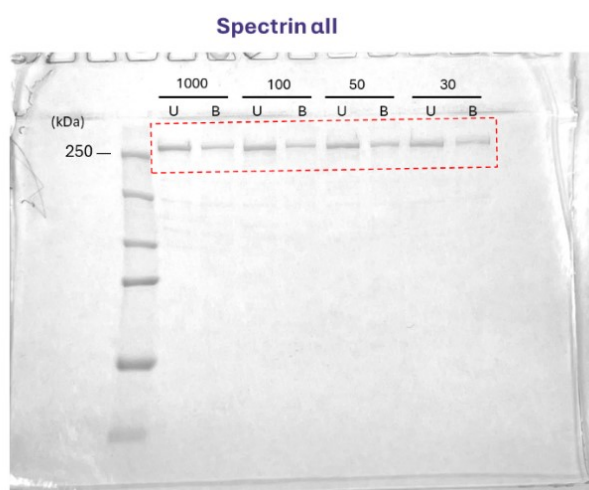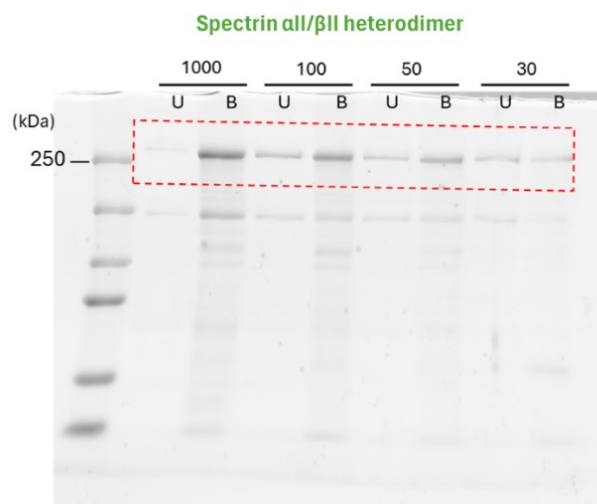

**Fig. S3** Full-length gel images corresponding to Fig. 5a in the main text. The red boxes indicate the regions used in the main figure.
